# Supplementary material for: PacBio But Not Illumina Technology Can Achieve Fast, Accurate and Complete Closure of the High GC, Complex Burkholderia pseudomallei Two-Chromosome Genome
Source: Front Microbiol. 2017 Aug 2;8:1448. doi: 10.3389/fmicb.2017.01448 (PMC5539568; doi:10.3389/fmicb.2017.01448)
Supplement: Supplementary file 4 [file Table_3.XLSX]

## Sheet: Supplementary Table S1
Supplementary Table S3. Nucleotide identity between contigs from Illumina assemblies and the reference genome
MIRA contigs	Percentage nucleotide identity to the reference genome			SPAdes contigs	Percentage nucleotide identity to the reference genome			Velvet contigs	Percentage nucleotide identity to the reference genome
	Chromosome I	Chromosome II			Chromosome I	Chromosome II			Chromosome I	Chromosome II
mira_Bp_denovo_c1	100			SPAdes_NODE_1	99.935			Velvet_NODE_1	100
mira_Bp_denovo_c100	100			SPAdes_NODE_10	99.97			Velvet_NODE_10	100
mira_Bp_denovo_c101	100			SPAdes_NODE_100	100			velvet_NODE_100	100
mira_Bp_denovo_c104	100			SPAdes_NODE_101	100			Velvet_NODE_102	100
mira_Bp_denovo_c105	99.99			SPAdes_NODE_102	100			velvet_NODE_103	99.99
mira_Bp_denovo_c106	100			SPAdes_NODE_105	100			Velvet_NODE_104	100
mira_Bp_denovo_c109	100			SPAdes_NODE_107	100			Velvet_NODE_105	99.95
mira_Bp_denovo_c11	100			SPAdes_NODE_108	100			Velvet_NODE_106	100
mira_Bp_denovo_c112	99.99			SPAdes_NODE_109	100			Velvet_NODE_107	99.99
mira_Bp_denovo_c113	100			SPAdes_NODE_111	100			Velvet_NODE_108	100
mira_Bp_denovo_c114	99.99			SPAdes_NODE_112	100			Velvet_NODE_109	100
mira_Bp_denovo_c115	99.97			SPAdes_NODE_114	100			Velvet_NODE_11	100
mira_Bp_denovo_c117	99.99			SPAdes_NODE_116	100			Velvet_NODE_110	98.77
mira_Bp_denovo_c119	99.99			SPAdes_NODE_118	100			Velvet_NODE_111	100
mira_Bp_denovo_c121	99.93			SPAdes_NODE_122	100			Velvet_NODE_114	100
mira_Bp_denovo_c122	99.96			SPAdes_NODE_123	100			Velvet_NODE_116	99.87
mira_Bp_denovo_c123	99.99			SPAdes_NODE_124	99.93			Velvet_NODE_117	100
mira_Bp_denovo_c126	100			SPAdes_NODE_126	99.942			Velvet_NODE_119	100
mira_Bp_denovo_c127	99.93			SPAdes_NODE_128	100			Velvet_NODE_120	100
mira_Bp_denovo_c128	100			SPAdes_NODE_130	100			Velvet_NODE_121	99.95
mira_Bp_denovo_c129	100			SPAdes_NODE_131	100			Velvet_NODE_123	99.99
mira_Bp_denovo_c135	99.98			SPAdes_NODE_132	100			Velvet_NODE_124	99.97
mira_Bp_denovo_c138	100			SPAdes_NODE_135	100			Velvet_NODE_127	100
mira_Bp_denovo_c139	100			SPAdes_NODE_136	100			Velvet_NODE_131	100
mira_Bp_denovo_c14	100			SPAdes_NODE_139	100			Velvet_NODE_132	100
mira_Bp_denovo_c140	100			SPAdes_NODE_142	100			Velvet_NODE_133	100
mira_Bp_denovo_c142	100			SPAdes_NODE_15	99.99			Velvet_NODE_136	100
mira_Bp_denovo_c144	100			SPAdes_NODE_150	99.74			Velvet_NODE_138	99.94
mira_Bp_denovo_c149	99.91			SPAdes_NODE_151	100			Velvet_NODE_14	100
mira_Bp_denovo_c150	100			SPAdes_NODE_153	100			Velvet_NODE_140	99.84
mira_Bp_denovo_c151	100			SPAdes_NODE_156	100			Velvet_NODE_143	99.92
mira_Bp_denovo_c152	99.89			SPAdes_NODE_161	100			Velvet_NODE_144	99.97
mira_Bp_denovo_c154	100			SPAdes_NODE_168	100			Velvet_NODE_145	100
mira_Bp_denovo_c155	99.99			SPAdes_NODE_17	100			Velvet_NODE_15	100
mira_Bp_denovo_c156	100			SPAdes_NODE_170	99.902			Velvet_NODE_151	99.97
mira_Bp_denovo_c159	100			SPAdes_NODE_171	100			Velvet_NODE_152	99.9
mira_Bp_denovo_c16	99.97			SPAdes_NODE_176	99.87			Velvet_NODE_153	100
mira_Bp_denovo_c161	100			SPAdes_NODE_179	100			velvet_NODE_155	100
mira_Bp_denovo_c163	100			SPAdes_NODE_181	99.83			velvet_NODE_157	100
mira_Bp_denovo_c165	100			SPAdes_NODE_184	100			Velvet_NODE_158	100
mira_Bp_denovo_c166	99.98			SPAdes_NODE_196	100			velvet_NODE_16	99.949
mira_Bp_denovo_c17	99.99			SPAdes_NODE_198	95			Velvet_NODE_161	100
mira_Bp_denovo_c171	100			SPAdes_NODE_199	98.958			Velvet_NODE_165	100
mira_Bp_denovo_c172	99.99			SPAdes_NODE_200	94.656			Velvet_NODE_167	100
mira_Bp_denovo_c174	100			SPAdes_NODE_201	100			Velvet_NODE_170	100
mira_Bp_denovo_c175	100			SPAdes_NODE_21	99.99			Velvet_NODE_171	100
mira_Bp_denovo_c178	99.97			SPAdes_NODE_22	100			Velvet_NODE_173	100
mira_Bp_denovo_c179	100			SPAdes_NODE_24	100			Velvet_NODE_174	99.74
mira_Bp_denovo_c18	99.99			SPAdes_NODE_25	100			Velvet_NODE_175	100
mira_Bp_denovo_c180	100			SPAdes_NODE_29	99.96			velvet_NODE_178	100
mira_Bp_denovo_c182	100			SPAdes_NODE_3	99.992			Velvet_NODE_179	100
mira_Bp_denovo_c184	99.98			SPAdes_NODE_31	99.97			velvet_NODE_18	100
mira_Bp_denovo_c185	100			SPAdes_NODE_32	99.99			Velvet_NODE_182	100
mira_Bp_denovo_c187	100			SPAdes_NODE_34	100			Velvet_NODE_184	100
mira_Bp_denovo_c188	99.99			SPAdes_NODE_36	99.97			Velvet_NODE_19	99.99
mira_Bp_denovo_c189	100			SPAdes_NODE_37	100			Velvet_NODE_190	100
mira_Bp_denovo_c19	99.99			SPAdes_NODE_39	99.945			Velvet_NODE_191	100
mira_Bp_denovo_c191	100			SPAdes_NODE_4	99.95			Velvet_NODE_196	100
mira_Bp_denovo_c192	100			SPAdes_NODE_40	100			Velvet_NODE_198	100
mira_Bp_denovo_c193	100			SPAdes_NODE_41	99.99			Velvet_NODE_202	100
mira_Bp_denovo_c194	100			SPAdes_NODE_42	99.941			Velvet_NODE_207	100
mira_Bp_denovo_c196	99.87			SPAdes_NODE_43	99.99			Velvet_NODE_21	99.99
mira_Bp_denovo_c198	100			SPAdes_NODE_46	100			Velvet_NODE_212	99.77
mira_Bp_denovo_c199	100			SPAdes_NODE_47	99.98			Velvet_NODE_213	100
mira_Bp_denovo_c2	100			SPAdes_NODE_48	99.99			Velvet_NODE_22	99.98
mira_Bp_denovo_c201	100			SPAdes_NODE_5	100			velvet_NODE_220	100
mira_Bp_denovo_c203	100			SPAdes_NODE_51	100			Velvet_NODE_221	99.96
mira_Bp_denovo_c204	100			SPAdes_NODE_52	100			Velvet_NODE_222	100
mira_Bp_denovo_c205	100			SPAdes_NODE_53	100			Velvet_NODE_225	100
mira_Bp_denovo_c208	100			SPAdes_NODE_56	99.99			Velvet_NODE_230	100
mira_Bp_denovo_c21	99.98			SPAdes_NODE_58	99.97			Velvet_NODE_237	100
mira_Bp_denovo_c213	100			SPAdes_NODE_62	99.99			Velvet_NODE_241	100
mira_Bp_denovo_c214	100			SPAdes_NODE_63	99.99			velvet_NODE_244	98.776
mira_Bp_denovo_c215	100			SPAdes_NODE_64	99.932			Velvet_NODE_245	92.21
mira_Bp_denovo_c219	100			SPAdes_NODE_65	100			velvet_NODE_246	99.942
mira_Bp_denovo_c22	99.99			SPAdes_NODE_7	100			Velvet_NODE_247	100
mira_Bp_denovo_c220	100			SPAdes_NODE_72	100			velvet_NODE_25	99.97
mira_Bp_denovo_c221	100			SPAdes_NODE_74	100			Velvet_NODE_251	100
mira_Bp_denovo_c222	100			SPAdes_NODE_76	100			Velvet_NODE_255	99.14
mira_Bp_denovo_c223	99.96			SPAdes_NODE_77	99.98			Velvet_NODE_256	100
mira_Bp_denovo_c224	99.94			SPAdes_NODE_78	100			Velvet_NODE_26	100
mira_Bp_denovo_c226	100			SPAdes_NODE_79	100			velvet_NODE_27	100
mira_Bp_denovo_c228	100			SPAdes_NODE_8	99.98			Velvet_NODE_275	99.87
mira_Bp_denovo_c229	100			SPAdes_NODE_80	100			velvet_NODE_276	100
mira_Bp_denovo_c230	99.69			SPAdes_NODE_83	100			Velvet_NODE_28	100
mira_Bp_denovo_c232	99.98			SPAdes_NODE_84	100			Velvet_NODE_292	100
mira_Bp_denovo_c234	100			SPAdes_NODE_85	100			Velvet_NODE_295	100
mira_Bp_denovo_c235	99.92			SPAdes_NODE_89	100			velvet_NODE_299	100
mira_Bp_denovo_c236	100			SPAdes_NODE_9	99.999			Velvet_NODE_3	100
mira_Bp_denovo_c24	99.99			SPAdes_NODE_90	100			Velvet_NODE_309	100
mira_Bp_denovo_c240	100			SPAdes_NODE_91	100			Velvet_NODE_31	100
mira_Bp_denovo_c241	99.98			SPAdes_NODE_99	100			velvet_NODE_318	99.222
mira_Bp_denovo_c242	99.51			SPAdes_NODE_103		100		Velvet_NODE_319	100
mira_Bp_denovo_c243	100			SPAdes_NODE_104		99.99		Velvet_NODE_32	100
mira_Bp_denovo_c25	99.99			SPAdes_NODE_106		99.91		Velvet_NODE_329	100
mira_Bp_denovo_c251	100			SPAdes_NODE_11		99.98		Velvet_NODE_342	100
mira_Bp_denovo_c256	100			SPAdes_NODE_110		99.98		Velvet_NODE_346	100
mira_Bp_denovo_c26	100			SPAdes_NODE_113		100		velvet_NODE_352	100
mira_Bp_denovo_c269	100			SPAdes_NODE_115		99.7		velvet_NODE_354	100
mira_Bp_denovo_c275	100			SPAdes_NODE_117		100		Velvet_NODE_36	100
mira_Bp_denovo_c277	98.38			SPAdes_NODE_119		100		Velvet_NODE_38	99.92
mira_Bp_denovo_c279	100			SPAdes_NODE_12		100		Velvet_NODE_385	100
mira_Bp_denovo_c283	100			SPAdes_NODE_120		100		velvet_NODE_4	99.99
mira_Bp_denovo_c286	100			SPAdes_NODE_121		99.55		Velvet_NODE_40	99.98
mira_Bp_denovo_c287	100			SPAdes_NODE_125		99.91		Velvet_NODE_418	99.81
mira_Bp_denovo_c289	100			SPAdes_NODE_127		99.86		Velvet_NODE_45	99.93
mira_Bp_denovo_c294	100			SPAdes_NODE_129		99.13		Velvet_NODE_49	100
mira_Bp_denovo_c299	100			SPAdes_NODE_13		99.99		Velvet_NODE_5	100
mira_Bp_denovo_c30	99.99			SPAdes_NODE_133		100		Velvet_NODE_51	100
mira_Bp_denovo_c300	99.94			SPAdes_NODE_134		100		Velvet_NODE_53	100
mira_Bp_denovo_c301	99.79			SPAdes_NODE_137		99.77		Velvet_NODE_55	100
mira_Bp_denovo_c31	99.99			SPAdes_NODE_138		100		Velvet_NODE_56	99.98
mira_Bp_denovo_c314	100			SPAdes_NODE_14		99.97		Velvet_NODE_57	100
mira_Bp_denovo_c315	100			SPAdes_NODE_140		100		Velvet_NODE_58	100
mira_Bp_denovo_c317	100			SPAdes_NODE_141		100		velvet_NODE_6	99.974
mira_Bp_denovo_c32	99.98			SPAdes_NODE_143		100		Velvet_NODE_60	99.91
mira_Bp_denovo_c35	100			SPAdes_NODE_144		97.71		Velvet_NODE_61	100
mira_Bp_denovo_c36	100			SPAdes_NODE_145		100		Velvet_NODE_62	99.99
mira_Bp_denovo_c38	100			SPAdes_NODE_146		100		Velvet_NODE_63	100
mira_Bp_denovo_c39	99.99			SPAdes_NODE_147		94.61		Velvet_NODE_67	100
mira_Bp_denovo_c4	99.99			SPAdes_NODE_148		99.633		Velvet_NODE_68	100
mira_Bp_denovo_c40	100			SPAdes_NODE_149		99.94		Velvet_NODE_69	99.99
mira_Bp_denovo_c43	100			SPAdes_NODE_152		99.87		Velvet_NODE_7	100
mira_Bp_denovo_c44	100			SPAdes_NODE_154		99.93		Velvet_NODE_71	99.9
mira_Bp_denovo_c45	100			SPAdes_NODE_155		99.708		Velvet_NODE_72	100
mira_Bp_denovo_c49	100			SPAdes_NODE_157		99.63		Velvet_NODE_73	100
mira_Bp_denovo_c51	99.97			SPAdes_NODE_158		100		Velvet_NODE_75	100
mira_Bp_denovo_c52	99.97			SPAdes_NODE_159		100		Velvet_NODE_78	100
mira_Bp_denovo_c53	100			SPAdes_NODE_16		100		Velvet_NODE_80	99.95
mira_Bp_denovo_c54	99.99			SPAdes_NODE_160		99.75		Velvet_NODE_82	100
mira_Bp_denovo_c56	99.99			SPAdes_NODE_162		99.49		Velvet_NODE_84	100
mira_Bp_denovo_c57	100			SPAdes_NODE_163		99.83		Velvet_NODE_85	100
mira_Bp_denovo_c62	100			SPAdes_NODE_164		100		Velvet_NODE_87	100
mira_Bp_denovo_c63	99.99			SPAdes_NODE_165		99.73		velvet_NODE_90	99.932
mira_Bp_denovo_c64	100			SPAdes_NODE_166		99.82		Velvet_NODE_92	99.8
mira_Bp_denovo_c67	99.99			SPAdes_NODE_167		99.73		Velvet_NODE_93	100
mira_Bp_denovo_c68	100			SPAdes_NODE_169		99.713		Velvet_NODE_94	100
mira_Bp_denovo_c7	100			SPAdes_NODE_172		99.58		Velvet_NODE_95	100
mira_Bp_denovo_c70	100			SPAdes_NODE_173		99.54		Velvet_NODE_97	100
mira_Bp_denovo_c71	99.96			SPAdes_NODE_174		99.877		Velvet_NODE_101		99.93
mira_Bp_denovo_c74	100			SPAdes_NODE_175		99.47		Velvet_NODE_112		99.78
mira_Bp_denovo_c76	99.99			SPAdes_NODE_177		100		Velvet_NODE_113		100
mira_Bp_denovo_c77	99.99			SPAdes_NODE_178		100		Velvet_NODE_118		99.89
mira_Bp_denovo_c79	100			SPAdes_NODE_18		100		Velvet_NODE_12		100
mira_Bp_denovo_c8	99.33			SPAdes_NODE_180		100		velvet_NODE_125		99.989
mira_Bp_denovo_c86	99.99			SPAdes_NODE_182		100		Velvet_NODE_126		99.99
mira_Bp_denovo_c87	100			SPAdes_NODE_183		99.82		Velvet_NODE_128		99.65
mira_Bp_denovo_c88	99.99			SPAdes_NODE_185		100		Velvet_NODE_129		100
mira_Bp_denovo_c9	99.99			SPAdes_NODE_186		99.23		Velvet_NODE_13		100
mira_Bp_denovo_c90	100			SPAdes_NODE_187		100		Velvet_NODE_130		99.99
mira_Bp_denovo_c91	100			SPAdes_NODE_188		100		Velvet_NODE_134		100
mira_Bp_denovo_c93	100			SPAdes_NODE_189		100		Velvet_NODE_135		99.89
mira_Bp_denovo_c94	100			SPAdes_NODE_19		99.93		Velvet_NODE_137		100
mira_Bp_denovo_c95	100			SPAdes_NODE_190		100		Velvet_NODE_139		100
mira_Bp_denovo_c96	99.99			SPAdes_NODE_191		99.74		Velvet_NODE_141		99.88
mira_Bp_denovo_c99	100			SPAdes_NODE_192		100		Velvet_NODE_142		100
mira_Bp_denovo_rep_c17226	99.8			SPAdes_NODE_193		99.73		Velvet_NODE_146		99.43
mira_Bp_denovo_rep_c17227	100			SPAdes_NODE_194		100		Velvet_NODE_154		100
mira_Bp_denovo_rep_c17228	99.87			SPAdes_NODE_195		100		Velvet_NODE_159		100
mira_Bp_denovo_rep_c17229	99.75			SPAdes_NODE_197		91.981		Velvet_NODE_160		100
mira_Bp_denovo_rep_c17232	99.87			SPAdes_NODE_2		99.99		Velvet_NODE_163		100
mira_Bp_denovo_rep_c17237	99.74			SPAdes_NODE_20		99.99		Velvet_NODE_164		100
mira_Bp_denovo_rep_c17239	100			SPAdes_NODE_23		100		Velvet_NODE_169		100
mira_Bp_denovo_rep_c17240	100			SPAdes_NODE_26		99.99		velvet_NODE_17		99.962
mira_Bp_denovo_rep_c17241	100			SPAdes_NODE_27		99.97		Velvet_NODE_176		100
mira_Bp_denovo_rep_c17248	100			SPAdes_NODE_28		100		Velvet_NODE_177		100
mira_Bp_denovo_rep_c17249	99.464			SPAdes_NODE_30		100		Velvet_NODE_183		99.96
mira_Bp_denovo_rep_c17250	100			SPAdes_NODE_33		99.98		Velvet_NODE_185		100
mira_Bp_denovo_rep_c17252	100			SPAdes_NODE_35		99.97		Velvet_NODE_187		99.91
mira_Bp_denovo_rep_c17253	100			SPAdes_NODE_38		100		Velvet_NODE_188		100
mira_Bp_denovo_rep_c17255	100			SPAdes_NODE_44		100		velvet_NODE_189		100
mira_Bp_denovo_rep_c17257	100			SPAdes_NODE_45		100		Velvet_NODE_192		99.83
mira_Bp_denovo_rep_c17261	100			SPAdes_NODE_49		99.99		Velvet_NODE_193		100
mira_Bp_denovo_rep_c17262	99.75			SPAdes_NODE_50		100		Velvet_NODE_195		99.97
mira_Bp_denovo_rep_c17263	100			SPAdes_NODE_54		99.98		Velvet_NODE_197		100
mira_Bp_denovo_rep_c17265	100			SPAdes_NODE_55		100		Velvet_NODE_199		99.92
mira_Bp_denovo_rep_c17266	100			SPAdes_NODE_57		100		Velvet_NODE_2		99.98
mira_Bp_denovo_rep_c17269	100			SPAdes_NODE_59		100		Velvet_NODE_20		100
mira_Bp_denovo_rep_c17271	100			SPAdes_NODE_6		99.94		Velvet_NODE_200		99.94
mira_Bp_denovo_rep_c17273	100			SPAdes_NODE_60		100		Velvet_NODE_201		99.49
mira_Bp_denovo_rep_c17280	100			SPAdes_NODE_61		100		Velvet_NODE_204		100
mira_Bp_denovo_rep_c17283	100			SPAdes_NODE_66		100		Velvet_NODE_205		100
mira_Bp_denovo_rep_c17285	100			SPAdes_NODE_67		99.97		Velvet_NODE_208		100
mira_Bp_denovo_rep_c17296	100			SPAdes_NODE_68		99.96		Velvet_NODE_209		100
mira_Bp_denovo_rep_c17297	100			SPAdes_NODE_69		100		Velvet_NODE_210		100
mira_Bp_denovo_rep_c17300	100			SPAdes_NODE_70		100		velvet_NODE_211		100
mira_Bp_denovo_rep_c17302	100			SPAdes_NODE_71		99.96		Velvet_NODE_215		99.8
mira_Bp_denovo_rep_c17313	100			SPAdes_NODE_73		100		Velvet_NODE_216		99.95
mira_Bp_denovo_rep_c17317	100			SPAdes_NODE_75		100		Velvet_NODE_217		100
mira_Bp_denovo_rep_c17319	99.813			SPAdes_NODE_81		99.9		velvet_NODE_218		100
mira_Bp_denovo_rep_c17320	99.29			SPAdes_NODE_82		100		Velvet_NODE_219		100
mira_Bp_denovo_rep_c17364	99.724			SPAdes_NODE_86		100		Velvet_NODE_223		99.53
mira_Bp_denovo_rep_c17414	99.79			SPAdes_NODE_87		99.99		Velvet_NODE_224		100
mira_Bp_denovo_rep_c17452	99.82			SPAdes_NODE_88		100		Velvet_NODE_226		99.81
mira_Bp_denovo_rep_c18433	99.929			SPAdes_NODE_92		100		Velvet_NODE_228		100
mira_Bp_denovo_rep_c18887	99.33			SPAdes_NODE_93		99.87		velvet_NODE_229		99.25
mira_Bp_denovo_c10		100		SPAdes_NODE_94		99.99		velvet_NODE_23		99.945
mira_Bp_denovo_c102		99.98		SPAdes_NODE_95		99.99		Velvet_NODE_232		100
mira_Bp_denovo_c103		100		SPAdes_NODE_96		99.99		Velvet_NODE_233		100
mira_Bp_denovo_c107		99.99		SPAdes_NODE_97		100		Velvet_NODE_234		99.86
mira_Bp_denovo_c108		100		SPAdes_NODE_98		99.99		Velvet_NODE_235		100
mira_Bp_denovo_c110		99.97						Velvet_NODE_236		99.99
mira_Bp_denovo_c111		100						Velvet_NODE_238		100
mira_Bp_denovo_c116		100						Velvet_NODE_239		100
mira_Bp_denovo_c118		99.97						Velvet_NODE_24		100
mira_Bp_denovo_c12		100						Velvet_NODE_243		95.41
mira_Bp_denovo_c120		100						Velvet_NODE_249		100
mira_Bp_denovo_c124		99.99						Velvet_NODE_250		99.95
mira_Bp_denovo_c125		99.94						Velvet_NODE_259		100
mira_Bp_denovo_c13		99.94						Velvet_NODE_260		99.91
mira_Bp_denovo_c130		100						Velvet_NODE_261		100
mira_Bp_denovo_c131		99.99						Velvet_NODE_262		100
mira_Bp_denovo_c132		100						Velvet_NODE_263		100
mira_Bp_denovo_c133		100						Velvet_NODE_264		100
mira_Bp_denovo_c134		100						Velvet_NODE_265		100
mira_Bp_denovo_c136		99.93						Velvet_NODE_266		100
mira_Bp_denovo_c137		99.99						velvet_NODE_269		100
mira_Bp_denovo_c141		100						Velvet_NODE_271		100
mira_Bp_denovo_c145		100						Velvet_NODE_272		99.95
mira_Bp_denovo_c146		99.86						Velvet_NODE_274		100
mira_Bp_denovo_c147		100						Velvet_NODE_279		100
mira_Bp_denovo_c148		99.96						Velvet_NODE_284		100
mira_Bp_denovo_c15		99.9						Velvet_NODE_285		99.59
mira_Bp_denovo_c153		99.91						velvet_NODE_286		100
mira_Bp_denovo_c157		100						Velvet_NODE_287		100
mira_Bp_denovo_c158		100						Velvet_NODE_288		100
mira_Bp_denovo_c160		99.73						velvet_NODE_289		100
mira_Bp_denovo_c162		100						Velvet_NODE_29		100
mira_Bp_denovo_c164		100						Velvet_NODE_291		100
mira_Bp_denovo_c167		99.99						Velvet_NODE_294		100
mira_Bp_denovo_c168		100						Velvet_NODE_296		96.28
mira_Bp_denovo_c169		100						Velvet_NODE_30		100
mira_Bp_denovo_c170		99.86						velvet_NODE_304		99.79
mira_Bp_denovo_c173		100						Velvet_NODE_308		100
mira_Bp_denovo_c176		100						velvet_NODE_315		100
mira_Bp_denovo_c177		99.67						Velvet_NODE_317		94.16
mira_Bp_denovo_c181		100						velvet_NODE_322		100
mira_Bp_denovo_c183		100						Velvet_NODE_33		100
mira_Bp_denovo_c186		100						Velvet_NODE_333		100
mira_Bp_denovo_c190		99.99						Velvet_NODE_337		99.06
mira_Bp_denovo_c195		100						Velvet_NODE_338		100
mira_Bp_denovo_c197		100						Velvet_NODE_34		100
mira_Bp_denovo_c20		100						Velvet_NODE_340		100
mira_Bp_denovo_c200		100						Velvet_NODE_344		100
mira_Bp_denovo_c2001		100						Velvet_NODE_35		99.85
mira_Bp_denovo_c202		100						Velvet_NODE_351		100
mira_Bp_denovo_c206		99.66						Velvet_NODE_353		100
mira_Bp_denovo_c207		100						Velvet_NODE_355		100
mira_Bp_denovo_c210		99.95						Velvet_NODE_365		99.92
mira_Bp_denovo_c216		99.96						Velvet_NODE_369		100
mira_Bp_denovo_c217		99.88						Velvet_NODE_37		99.99
mira_Bp_denovo_c218		100						velvet_NODE_371		100
mira_Bp_denovo_c2231		100						Velvet_NODE_373		100
mira_Bp_denovo_c227		100						Velvet_NODE_374		100
mira_Bp_denovo_c23		99.99						Velvet_NODE_380		100
mira_Bp_denovo_c231		100						Velvet_NODE_39		99.99
mira_Bp_denovo_c233		100						Velvet_NODE_408		100
mira_Bp_denovo_c237		97.18						Velvet_NODE_41		100
mira_Bp_denovo_c239		99.95						Velvet_NODE_419		99.91
mira_Bp_denovo_c244		100						Velvet_NODE_42		100
mira_Bp_denovo_c245		99.74						velvet_NODE_43		99.966
mira_Bp_denovo_c246		100						Velvet_NODE_44		100
mira_Bp_denovo_c247		99.91						Velvet_NODE_46		100
mira_Bp_denovo_c248		99.98						Velvet_NODE_47		100
mira_Bp_denovo_c249		100						velvet_NODE_48		99.94
mira_Bp_denovo_c252		100						Velvet_NODE_50		99.99
mira_Bp_denovo_c253		100						Velvet_NODE_52		99.99
mira_Bp_denovo_c254		100						Velvet_NODE_54		100
mira_Bp_denovo_c257		99.64						Velvet_NODE_59		100
mira_Bp_denovo_c258		99.95						Velvet_NODE_64		99.98
mira_Bp_denovo_c261		100						Velvet_NODE_65		99.99
mira_Bp_denovo_c264		99.91						Velvet_NODE_66		100
mira_Bp_denovo_c265		100						velvet_NODE_70		99.981
mira_Bp_denovo_c27		100						velvet_NODE_74		99.966
mira_Bp_denovo_c270		100						Velvet_NODE_76		99.73
mira_Bp_denovo_c271		99.15						Velvet_NODE_77		99.88
mira_Bp_denovo_c272		99.93						Velvet_NODE_79		99.98
mira_Bp_denovo_c278		99.66						Velvet_NODE_8		100
mira_Bp_denovo_c28		100						Velvet_NODE_81		99.95
mira_Bp_denovo_c280		99.8						Velvet_NODE_83		100
mira_Bp_denovo_c288		99.63						Velvet_NODE_86		100
mira_Bp_denovo_c29		100						Velvet_NODE_88		100
mira_Bp_denovo_c292		100						Velvet_NODE_89		99.99
mira_Bp_denovo_c293		99.66						Velvet_NODE_9		99.97
mira_Bp_denovo_c295		99.42						Velvet_NODE_91		99.93
mira_Bp_denovo_c296		100						Velvet_NODE_96		100
mira_Bp_denovo_c298		100						velvet_NODE_98		100
mira_Bp_denovo_c3		100						Velvet_NODE_99		100
mira_Bp_denovo_c305		98.86
mira_Bp_denovo_c309		99.88
mira_Bp_denovo_c310		100
mira_Bp_denovo_c316		100
mira_Bp_denovo_c318		100
mira_Bp_denovo_c319		99.728
mira_Bp_denovo_c320		98.494
mira_Bp_denovo_c322		99.818
mira_Bp_denovo_c329		95.65
mira_Bp_denovo_c33		100
mira_Bp_denovo_c330		99.89
mira_Bp_denovo_c334		100
mira_Bp_denovo_c338		100
mira_Bp_denovo_c34		99.98
mira_Bp_denovo_c340		100
mira_Bp_denovo_c37		99.97
mira_Bp_denovo_c3793		99.9
mira_Bp_denovo_c41		99.77
mira_Bp_denovo_c42		100
mira_Bp_denovo_c46		99.99
mira_Bp_denovo_c47		99.99
mira_Bp_denovo_c48		100
mira_Bp_denovo_c5		100
mira_Bp_denovo_c50		100
mira_Bp_denovo_c55		100
mira_Bp_denovo_c58		99.99
mira_Bp_denovo_c6		100
mira_Bp_denovo_c60		100
mira_Bp_denovo_c61		100
mira_Bp_denovo_c65		99.99
mira_Bp_denovo_c66		99.54
mira_Bp_denovo_c69		99.92
mira_Bp_denovo_c72		100
mira_Bp_denovo_c73		99.97
mira_Bp_denovo_c75		100
mira_Bp_denovo_c78		100
mira_Bp_denovo_c80		99.97
mira_Bp_denovo_c81		100
mira_Bp_denovo_c82		99.95
mira_Bp_denovo_c83		100
mira_Bp_denovo_c84		99.99
mira_Bp_denovo_c85		100
mira_Bp_denovo_c89		100
mira_Bp_denovo_c92		99.86
mira_Bp_denovo_c97		99.99
mira_Bp_denovo_c98		100
mira_Bp_denovo_rep_c17230		99.56
mira_Bp_denovo_rep_c17231		99.598
mira_Bp_denovo_rep_c17242		99.86
mira_Bp_denovo_rep_c17243		100
mira_Bp_denovo_rep_c17244		100
mira_Bp_denovo_rep_c17246		100
mira_Bp_denovo_rep_c17247		100
mira_Bp_denovo_rep_c17256		100
mira_Bp_denovo_rep_c17264		100
mira_Bp_denovo_rep_c17267		100
mira_Bp_denovo_rep_c17272		100
mira_Bp_denovo_rep_c17274		100
mira_Bp_denovo_rep_c17277		100
mira_Bp_denovo_rep_c17281		100
mira_Bp_denovo_rep_c17282		100
mira_Bp_denovo_rep_c17284		100
mira_Bp_denovo_rep_c17286		99.783
mira_Bp_denovo_rep_c17291		100
mira_Bp_denovo_rep_c17293		100
mira_Bp_denovo_rep_c17298		100
mira_Bp_denovo_rep_c17306		100
mira_Bp_denovo_rep_c17310		100
mira_Bp_denovo_rep_c17318		97.496
mira_Bp_denovo_rep_c17321		100
mira_Bp_denovo_rep_c17352		94.545
mira_Bp_denovo_rep_c17377		99.71
mira_Bp_denovo_rep_c17509		100
mira_Bp_denovo_rep_c17729		99.568
mira_Bp_denovo_rep_c17778		100
mira_Bp_denovo_rep_c17792		99.82
mira_Bp_denovo_rep_c18885		99.23
mira_Bp_denovo_rep_c18889		99.032
